# Supplementary material
Source: publisher figshare collection journal article supplement (https://acs.figshare.com/ndownloader/files/7788910)
Supplement: Supplementary file 1 [file 7788910]

# Downstream Processability of Crystal Habit-modified Active Pharmaceutical Ingredient

*Nawin Pudasaini<sup>1</sup>, Pratik P. Upadhyay<sup>1</sup>, Christian R. Parker<sup>2</sup>, Stefan U. Hagen<sup>2</sup>, Andrew D. Bond<sup>1,3</sup>, Jukka Rantanen<sup>1\*</sup>*

<sup>1</sup>Department of Pharmacy, Faculty of Health and Medical Sciences, University of Copenhagen, Universitetsparken 2, Copenhagen, Denmark

<sup>2</sup> Syntese A/S, Industriholmen 11-13, Hvidovre, Denmark

<sup>3</sup> Department of Chemistry, University of Cambridge, UK

## Supporting Information

## 1. Size and shape-related particle parameters

**Figure SI 1** below illustrates the concept of major and minor axis used to define length and width of the particles.<sup>1</sup> The major axis passes through the center of the mass of the particles at an orientation corresponding to the minimum rotational energy of the shape. The minor axis passes through the center of mass at right angles to the major axis.

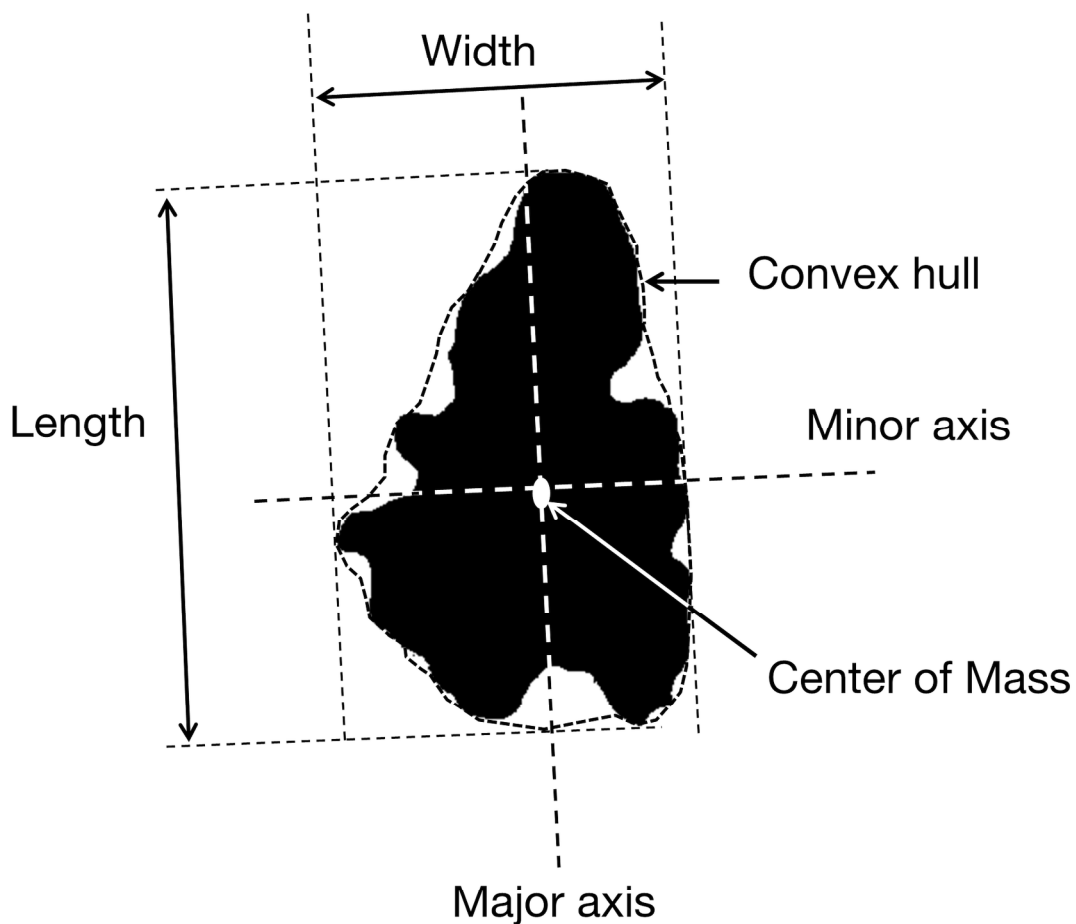

**Figure SI 1:** Spheroid crystal with major, minor axes, and convex hull indicated with a dotted line. The convex hull is an imaginary line inscribing particles, formed by touching the outer edge of the particle. The convex hull is necessary to calculate convexity and solidity as defined in **Table SI 1**.

**Table SI 1:** Definition of size and shape-related parameters used to characterize crystals.

**Shape Parameters\***

|                |                                                                                                                                                                                                                                                    |
|----------------|----------------------------------------------------------------------------------------------------------------------------------------------------------------------------------------------------------------------------------------------------|
| Aspect ratio   | The ratio of the width to the length of the crystal.                                                                                                                                                                                               |
| Circularity    | The ratio of the circumference of a circle equal to the crystal projected area to the perimeter of the crystal.                                                                                                                                    |
| Solidity       | Pixel area of the crystal divided by the area enclosed by the convex hull.                                                                                                                                                                         |
| Convexity      | The perimeter of the convex hull of the crystal, divided by its perimeter. The convex hull can be considered as the border created by an imaginary rubber band wrapped around the crystal, represented by the dotted outline in <b>Figure SI 1</b> |
| HS circularity | It is circularity squared. It is used to compare particles with similar circularity values.                                                                                                                                                        |

---

|                            |                                                                                                                                                                     |
|----------------------------|---------------------------------------------------------------------------------------------------------------------------------------------------------------------|
| <b>Size Parameters</b>     |                                                                                                                                                                     |
| Circle Equivalent diameter | The diameter of a circle with the same area as the projected area of the crystal image.                                                                             |
| Area                       | The visual projected area of the crystal.                                                                                                                           |
| Length                     | All the possible lines between two points on the perimeter are projected on the major axis of the crystal. The longest of those lines is the length of the crystal. |
| Width                      | All the possible lines between two points on the perimeter are projected on the minor axis of the crystal. The longest of this line is the width of the crystal.    |
| Perimeter                  | The total length of the crystal boundary calculated by summing the length of the boundary pixels.                                                                   |

\*Values of shape-related parameter ranges between 0 and 1

## 2. Powder ring shear tester

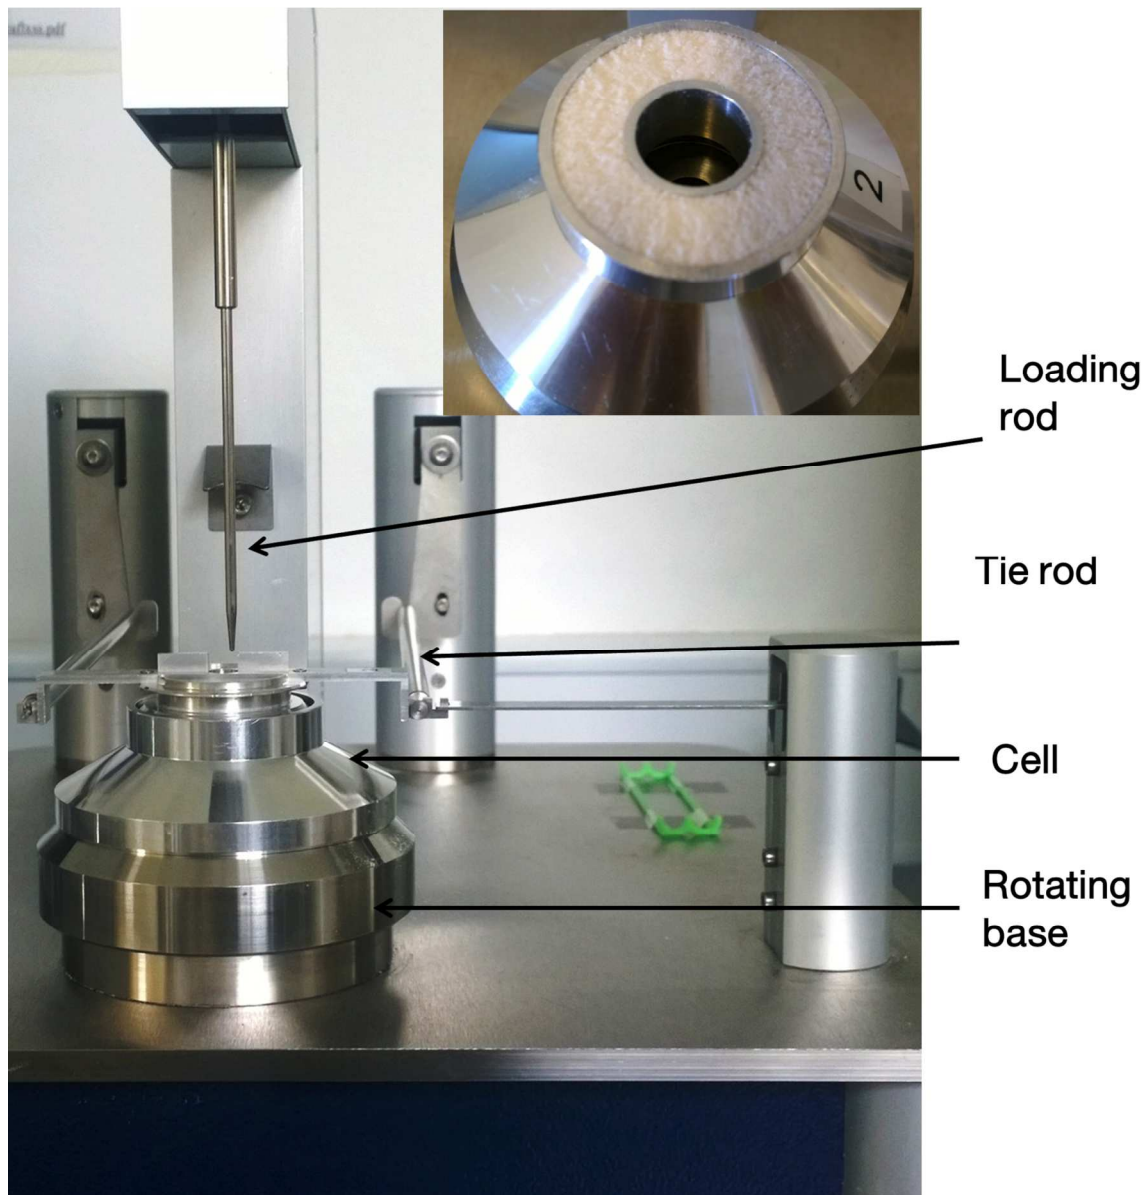

**Figure SI 2:** Schulz ring shear tester<sup>2</sup> with its major components used for determination of yield locus (a measure of stress needed to make powder flow after consolidation) and two Mohr's stress circle (**Figure SI 3**). The inset displays the shear cell (volume 3.5 ml) filled with powder in annular space. Normal stress is applied through loading rod, while the base rotates at a fixed

velocity. The lid is fixed during rotation through the attached tie rod, which in itself is removable. The load beams connected to tie rods measures the shear stress.

The pairs of normal stress and shear stress are used to construct a yield locus and two Mohr's stress circle (**Figure SI 3**). The greater Mohr's circle represents stress state in powder during consolidation and gives consolidation major principal stress ( $\sigma_1$ ); while the smaller one describes stress state under unconfined compression and gives unconfined yield strength ( $\sigma_c$ ). To quantify powder flow, the two parameters *viz.* effective angle of internal friction ( $\phi_e$ ) and flowability index ( $ff_c$ ) can be calculated. Flowability index ( $ff_c$ ) is the ratio of  $\sigma_c$  and  $\sigma_1$ , and the effective angle of internal friction is represented by the angle of effective yield locus (the straight line passing through origin and tangent to the greater Mohr circle).

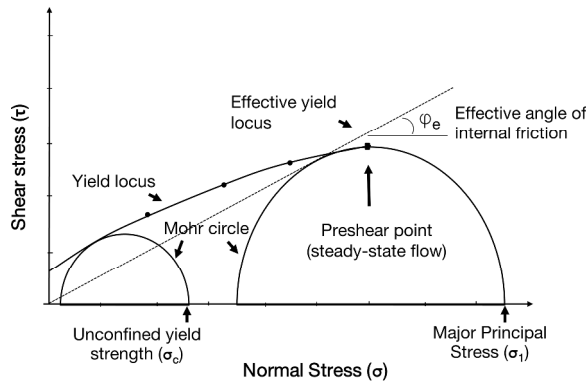

**Figure SI 3:** Typical yield locus and Mohr's stress circle to calculate flowability index and effective angle of internal friction with ring shear tester.

### 3. Flow rate analyzer (FlowPro)

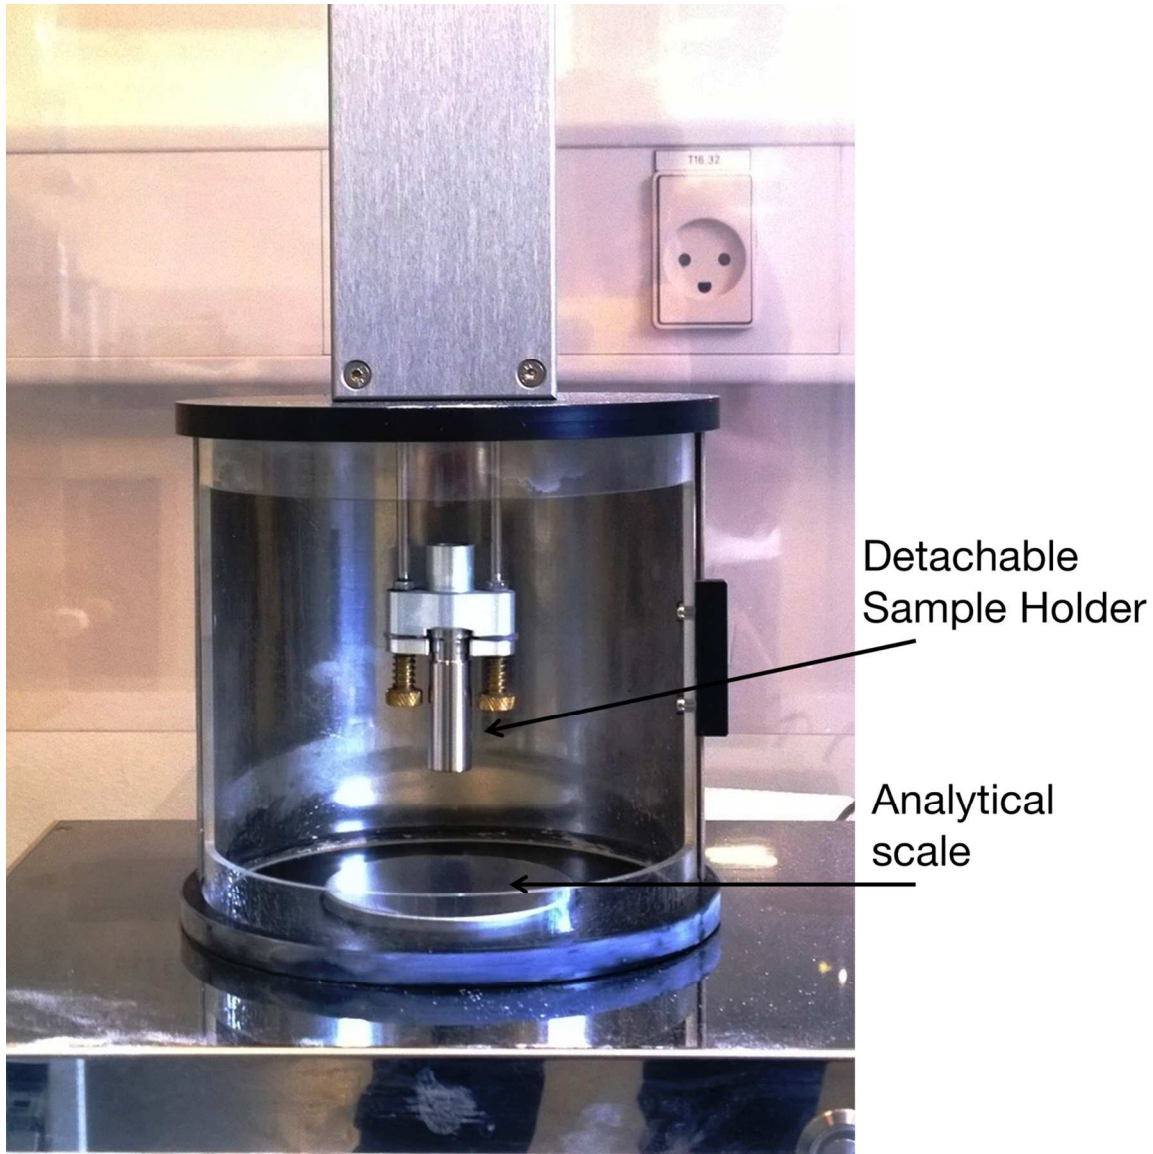

**Figure SI 4:** Flow rate analyzer<sup>3</sup> with its principal components. The detachable sample holder is inside the enclosure. The sample holder can oscillate vertically at a frequency of 1 Hz with the help of lever attached to it.

Flow rate analyzer consists of a cylindrical sample holder (volume  $5 \text{ cm}^3$ ) that is open at the top, but with an orifice (diameter 3 mm) underside, an analytical balance, and a motor connected to a computer.

#### 4. Flow properties and tableability indicator values measured for six crystal habits

In the following table, data used to construct spider chart in Figure 7 of paper are given.

**Table SI 2:** Different flow properties and tableability parameters used to construct spider chart.

| Indicators/Habits                                         | Needles | Plates | Rectangular<br>bars | Rhombohedrals | Spheroids | Elongated<br>hexagons |
|-----------------------------------------------------------|---------|--------|---------------------|---------------|-----------|-----------------------|
| Flowability ( <i>ffc</i> )                                | 2.0     | 5.8    | 4.7                 | 7.5           | 19.9      | 22.5                  |
| Flow rate (mg/s)                                          | 1       | 7      | 2                   | 24            | 206       | 315                   |
| Bulk density (g/ml)                                       | 0.14    | 0.19   | 0.27                | 0.54          | 0.53      | 0.63                  |
| Effective angle of<br>internal friction<br>(degree, °)    | 49.6    | 37.3   | 40.4                | 36.1          | 35.8      | 32.5                  |
| Tablet Tensile<br>strength (MPa) at<br>0.9 solid fraction | 2.86    | 1.4    | 0.79                | 0.46          | 0.89      | 0.36                  |

**5. Scanning electron microscopy Image of Microcrystalline cellulose PH 102**

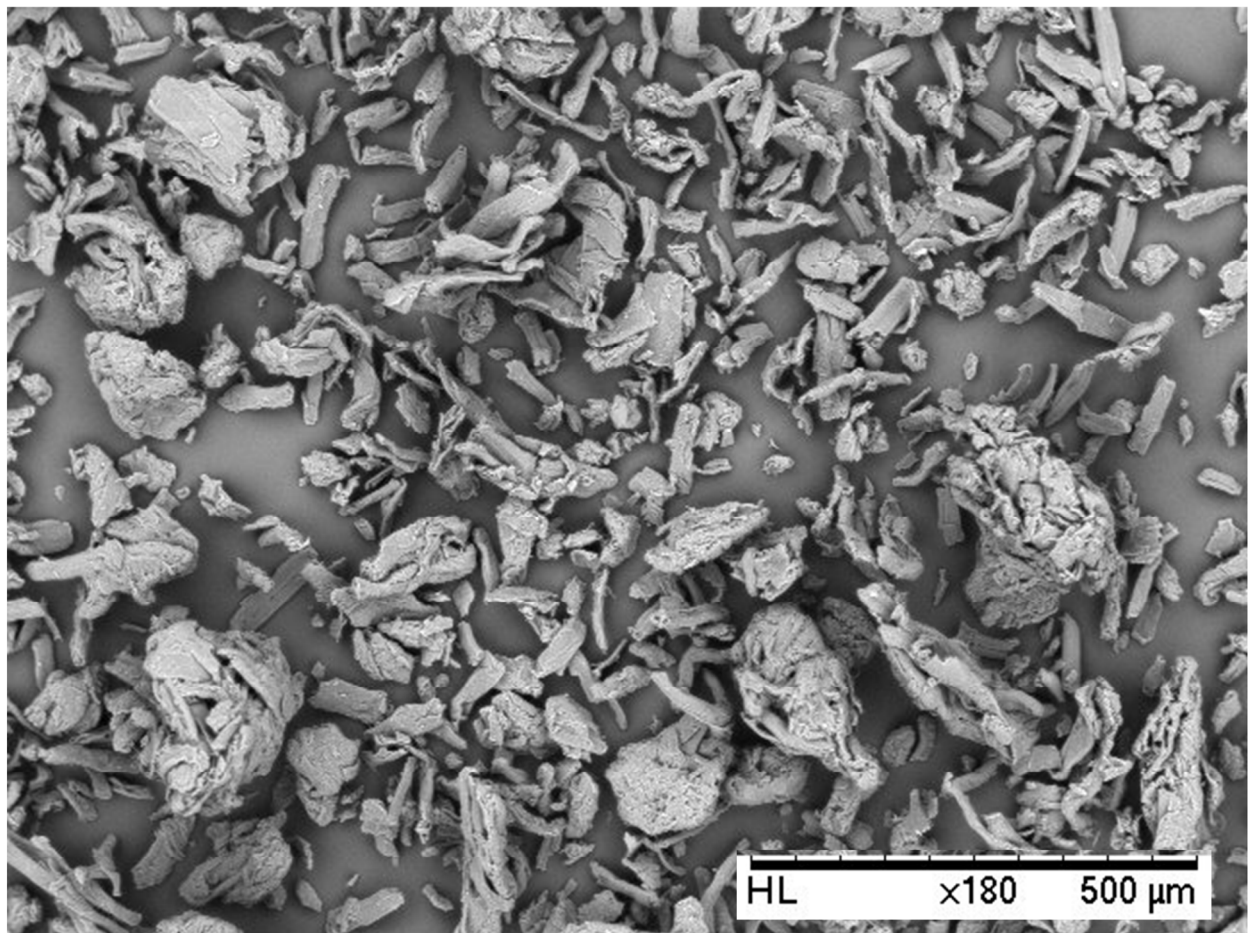



## REFERENCES

1. Morphologi G3 user manual Malvern Instruments Ltd.: United Kingdom, 2015.  
<http://www.malvern.com/en/support/resource-center/user-manuals/MAN0410EN.aspx>  
(accessed September 20, 2016).
2. Schulze, D. Ring Shear tester RST-Xs.s, smaller and more capabilities; Dr.-Ing. Dietmar Schulze Schuttgutmesstechnik: Wolfenbuttel, Germany, 2014. <http://www.dietmar-schulze.de/leafxsse.pdf> (accessed November 21, 2016).
3. Seppala, K.; Heinamaki, J.; Hatara, J.; Seppala, L.; Yliruusi, J. *AAPS PharmSciTech* **2010**, *11* (1), 402-408.
